# Supplementary material
Source: PubMed Central journal article supplement (PMC3931256)
Supplement: NIHMS506064-supplement-01.pdf [file NIHMS506064-supplement-01.pdf]

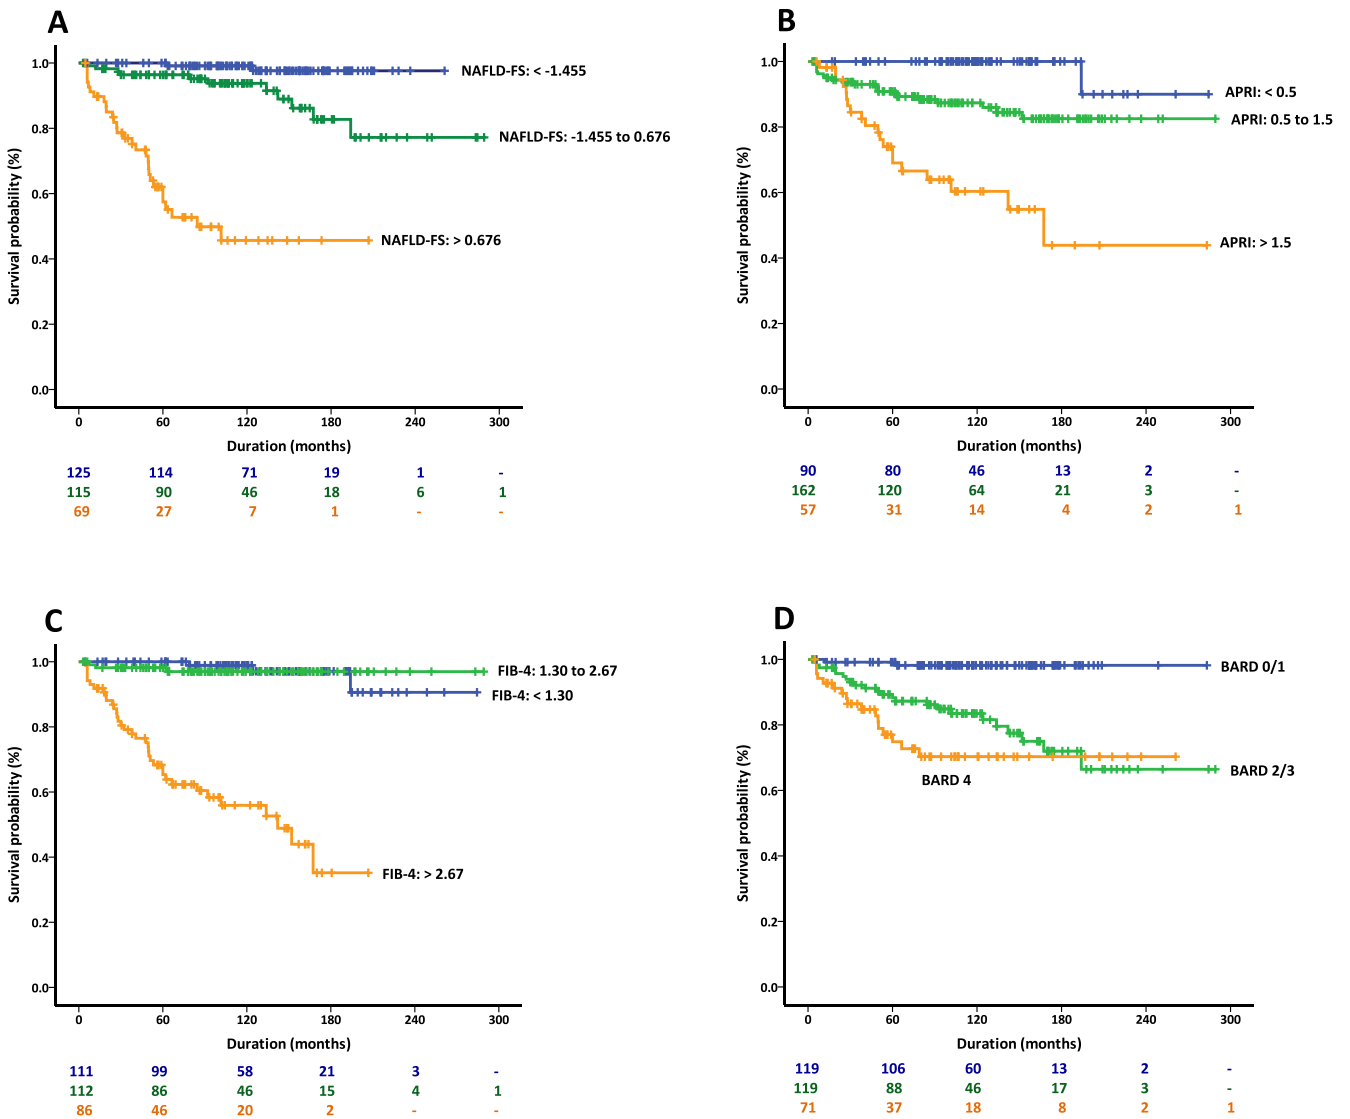

**Supplementary Figure 1.** Cumulative liver-related events by (A) NAFLD-FS category ( $P < .001$ ); (B) APRI category ( $P < .001$ ); (C) FIB-4 score category ( $P < .001$ ); and (D) BARD score category ( $P < .001$ ).

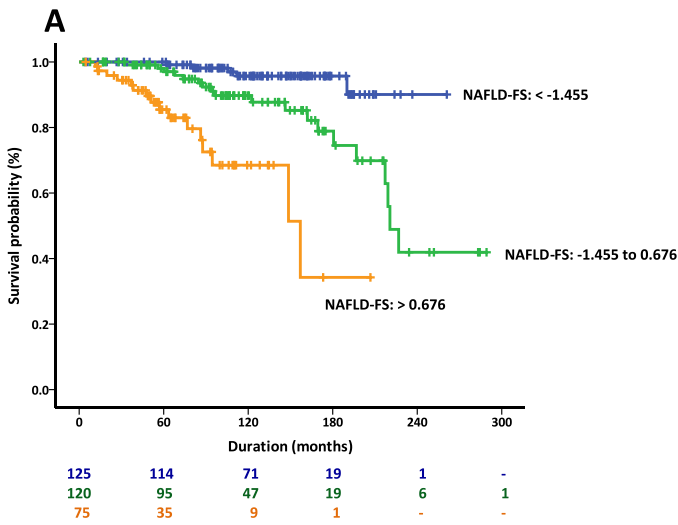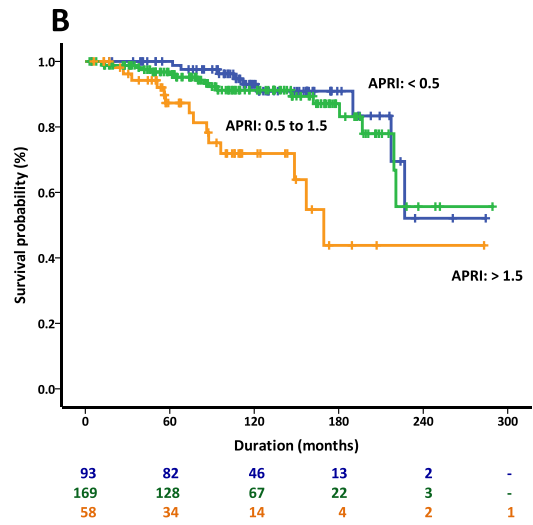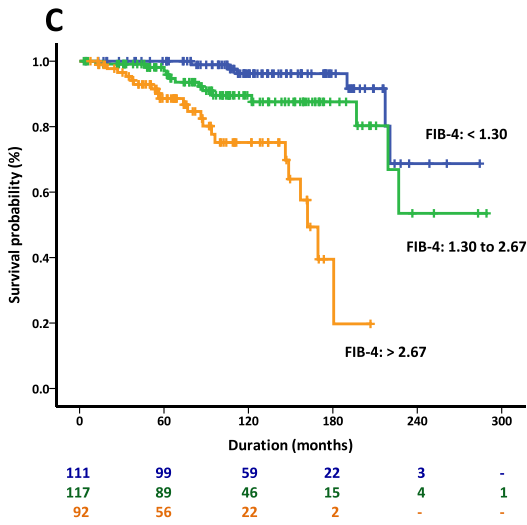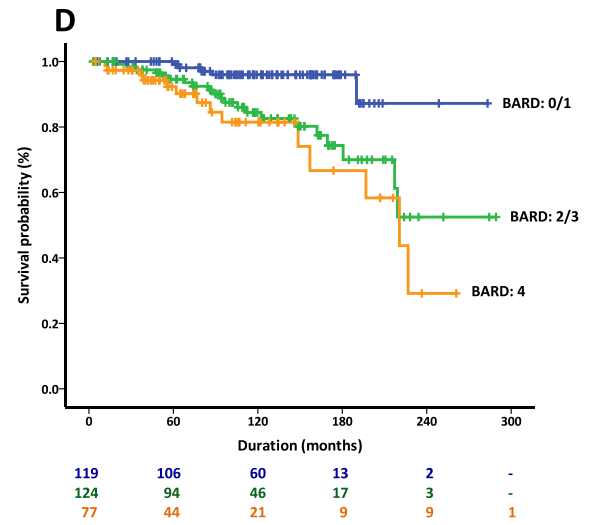

**Supplementary Figure 2.** Cumulative death/liver transplantation by (A) NAFLD-FS category ( $P < .001$ ); (B) APRI category ( $P < .001$ ); (C) FIB-4 score category ( $P = .03$ ); and (D) BARD score category ( $P = .001$ ).

**Supplementary Table 1.** Multivariate aHRs and 95% CIs of Outcome by Risk Score Category for the Outcome of Liver-Related Events

|                   | HR      | 95% CI    | P value |
|-------------------|---------|-----------|---------|
| <b>Model 1</b>    |         |           |         |
| NAFLD-FS          |         |           |         |
| Low risk          | 1 (Ref) |           |         |
| Intermediate risk | 7.7     | 1.4–42.7  | <.02    |
| High risk         | 34.2    | 6.5–180.9 | <.001   |
| Sex               |         |           |         |
| Female            | 1 (Ref) |           |         |
| Male              | 1.0     | 0.5–1.9   | .9      |
| Race category     |         |           |         |
| White             | 1 (Ref) |           |         |
| Non-white         | 2.1     | 0.5–9.4   | .3      |
| Hypertension      |         |           |         |
| No                | 1 (Ref) |           |         |
| Yes               | 0.7     | 0.4–1.3   | .3      |
| Statins           |         |           |         |
| No                | 1 (Ref) | 0.4–3.1   | .8      |
| Yes               | 1.1     |           |         |
| Fibrosis stage    |         |           |         |
| 0                 | 1 (Ref) | 0.05–2.4  | .3      |
| 1–2               | 0.3     | 0.6–10.3  | .2      |
| 3–4               | 2.6     |           |         |
| <b>Model 2</b>    |         |           |         |
| APRI              |         |           |         |
| Low risk          | 1 (Ref) |           |         |
| Intermediate risk | 8.8     | 1.1–67.3  | .04     |
| High risk         | 20.9    | 2.6–165.3 | .004    |
| Sex               |         |           |         |
| Female            | 1 (Ref) |           |         |
| Male              | 1.6     | 0.8–3.4   | .2      |
| Age               | 1.1     | 1.04–1.13 | <.001   |
| BMI               | 1.0     | 0.9–1.1   | .4      |
| Race category     |         |           |         |
| White             | 1 (Ref) |           |         |
| Non-white         | 1.3     | 0.3–6.4   | .7      |
| Hypertension      |         |           |         |
| No                | 1 (Ref) |           |         |
| Yes               | 0.7     | 0.4–1.4   | .3      |
| Statins           |         |           |         |
| No                | 1 (Ref) |           |         |
| Yes               | 0.9     | 0.3–2.3   | .8      |
| Diabetes          |         |           |         |
| No                | 1 (Ref) |           |         |
| Yes               | 0.8     | 0.4–1.6   | .6      |
| Fibrosis stage    |         |           |         |
| 0                 | 1 (Ref) |           |         |
| 1–2               | 0.3     | 0.05–2.0  | .2      |
| 3–4               | 3.4     | 0.9–14.4  | .07     |
| <b>Model 3</b>    |         |           |         |
| FIB-4             |         |           |         |
| Low risk          | 1 (Ref) |           |         |
| Intermediate risk | 0.92    | 0.2–4.8   | .9      |
| High risk         | 14.6    | 4.1–52.6  | <.001   |
| Sex               |         |           |         |
| Female            | 1 (Ref) |           |         |
| Male              | 1.1     | 0.5–2.1   | .9      |
| Race category     |         |           |         |
| White             | 1 (Ref) |           |         |
| Non-white         | 0.95    | 0.2–4.8   | .9      |
| BMI               | 1.0     | 0.9–1.1   | .7      |
| Hypertension      |         |           |         |
| No                | 1 (Ref) |           |         |
| Yes               | 0.7     | 0.4–1.3   | .2      |

**Supplementary Table 1.** Continued

|                   | HR      | 95% CI   | P value |
|-------------------|---------|----------|---------|
| Statins           |         |          |         |
| No                | 1 (Ref) |          |         |
| Yes               | 1.1     | 0.4–2.8  | .9      |
| Diabetes          |         |          |         |
| No                | 1 (Ref) |          |         |
| Yes               | 0.7     | 0.3–1.3  | .2      |
| Fibrosis stage    |         |          |         |
| 0                 | 1 (Ref) |          |         |
| 1–2               | 0.6     | 0.1–4.0  | .6      |
| 3–4               | 6.2     | 1.6–23.6 | .007    |
| <b>Model 4</b>    |         |          |         |
| BARD              |         |          |         |
| Low risk          | 1 (Ref) |          |         |
| Intermediate risk | 6.2     | 1.4–27.2 | <.02    |
| High risk         | 6.6     | 1.4–31.1 | <.02    |
| Sex               |         |          |         |
| Female            | 1 (Ref) |          |         |
| Male              | 1.7     | 0.8–3.5  | .1      |
| Age               | 1.1     | 1.04–1.1 | <.001   |
| Race category     |         |          |         |
| White             | 1 (Ref) |          |         |
| Non-white         | 1.5     | 0.3–6.7  | .6      |
| Hypertension      |         |          |         |
| No                | 1 (Ref) |          |         |
| Yes               | 0.6     | 0.3–1.2  | .2      |
| Statins           |         |          |         |
| No                | 1 (Ref) |          |         |
| Yes               | 0.5     | 0.2–1.3  | .2      |
| Fibrosis stage    |         |          |         |
| 0                 | 1 (Ref) |          |         |
| 1–2               | 0.4     | 0.07–2.6 | .4      |
| 3–4               | 5.3     | 1.5–18.7 | <.001   |

**Supplementary Table 2.** Multivariate aHRs and 95% CIs of Outcome by Risk Score Category for the Outcome of Death/Liver Transplantation

|                   | HR      | 95% CI    | P value |
|-------------------|---------|-----------|---------|
| <b>Model 1</b>    |         |           |         |
| NAFLD-FS          |         |           |         |
| Low risk          | 1 (Ref) |           |         |
| Intermediate risk | 4.2     | 1.3–13.8  | <.02    |
| High risk         | 9.8     | 2.7–35.3  | <.001   |
| Sex               |         |           |         |
| Female            | 1 (Ref) |           |         |
| Male              | 0.7     | 0.3–1.5   | .4      |
| Race category     |         |           |         |
| White             | 1 (Ref) |           |         |
| Non-white         | 1.8     | 0.4–8.2   | .4      |
| Hypertension      |         |           |         |
| No                | 1 (Ref) |           |         |
| Yes               | 1.6     | 0.8–3.1   | .2      |
| Statins           |         |           |         |
| No                | 1 (Ref) |           |         |
| Yes               | 1.2     | 0.3–4.4   | .8      |
| Fibrosis stage    |         |           |         |
| 0                 | 1 (Ref) |           |         |
| 1-2               | 0.7     | 0.2–2.5   | .6      |
| 3-4               | 2.0     | 0.7–6.4   | .2      |
| <b>Model 2</b>    |         |           |         |
| APRI              |         |           |         |
| Low risk          | 1 (Ref) |           |         |
| Intermediate risk | 1.1     | 0.4–2.7   | .9      |
| High risk         | 3.1     | 1.1–8.4   | .03     |
| Sex               |         |           |         |
| Female            | 1 (Ref) |           |         |
| Male              | 1.1     | 0.5–2.3   | .9      |
| Age               | 1.1     | 1.05–1.14 | <.001   |
| BMI               | 1.0     | 0.9–1.1   | .9      |
| Race category     |         |           |         |
| White             | 1 (Ref) |           |         |
| Non-white         | 2.5     | 0.5–12.6  | .3      |
| Hypertension      |         |           |         |
| No                | 1 (Ref) |           |         |
| Yes               | 1.4     | 0.7–2.6   | .4      |
| Statins           |         |           |         |
| No                | 1 (Ref) |           |         |
| Yes               | 0.9     | 0.3–3.3   | .9      |
| Diabetes          |         |           |         |
| No                | 1 (Ref) |           |         |
| Yes               | 0.8     | 0.4–1.7   | .6      |
| Fibrosis stage    |         |           |         |
| 0                 | 1 (Ref) |           |         |
| 1-2               | 0.7     | 0.2–2.3   | .6      |
| 3-4               | 2.6     | 0.8–8.7   | .1      |
| <b>Model 3</b>    |         |           |         |
| FIB-4             |         |           |         |
| Low risk          | 1 (Ref) |           |         |
| Intermediate risk | 2.3     | 0.8–6.6   | .1      |
| High risk         | 6.9     | 2.3–20.4  | .001    |
| Sex               |         |           |         |
| Female            | 1 (Ref) |           |         |
| Male              | 0.6     | 0.3–1.4   | .3      |
| Race category     |         |           |         |
| White             | 1 (Ref) |           |         |
| Non-white         | 0.9     | 0.2–4.3   | .8      |
| BMI               | 1.0     | 0.9–1.04  | .3      |
| Hypertension      |         |           |         |
| No                | 1 (Ref) |           |         |
| Yes               | 1.4     | 0.7–2.7   | .3      |

**Supplementary Table 2.** Continued

|                   | HR      | 95% CI    | P value |
|-------------------|---------|-----------|---------|
| Statins           |         |           |         |
| No                | 1 (Ref) |           |         |
| Yes               | 0.8     | 0.2–2.9   | .8      |
| Diabetes          |         |           |         |
| No                | 1 (Ref) |           |         |
| Yes               | 0.8     | 0.4–1.6   | .6      |
| Fibrosis stage    |         |           |         |
| 0                 | 1 (Ref) |           |         |
| 1–2               | 1.1     | 0.4–3.5   | .8      |
| 3–4               | 3.3     | 1.1–10.1  | .03     |
| <b>Model 4</b>    |         |           |         |
| BARD              |         |           |         |
| Low risk          | 1 (Ref) |           |         |
| Intermediate risk | 1.8     | 0.6–5.1   | .3      |
| High risk         | 1.6     | 0.5–4.9   | .4      |
| Sex               |         |           |         |
| Female            | 1 (Ref) |           |         |
| Male              | 1.1     | 0.5–2.4   | .8      |
| Age               | 1.1     | 1.05–1.13 | <.001   |
| Race category     |         |           |         |
| White             | 1 (Ref) |           |         |
| Non-white         | 0.5     | 0.1–4.2   | .6      |
| Hypertension      |         |           |         |
| No                | 1 (Ref) |           |         |
| Yes               | 1.2     | 0.6–2.4   | .5      |
| Statins           |         |           |         |
| No                | 1 (Ref) |           |         |
| Yes               | 0.5     | 0.2–2.4   | .5      |
| Fibrosis stage    |         |           |         |
| 0                 | 1 (Ref) |           |         |
| 1–2               | 0.9     | 0.3–2.6   | .8      |
| 3–4               | 3.4     | 1.2–9.7   | .02     |
